# Supplementary material
Source: PubMed Central journal article supplement (PMC2690006)
Supplement: 0902324106_0902324106SI.pdf [file 0902324106_0902324106SI.pdf]

# Supporting Information

Sagermann et al. 10.1073/pnas.0902324106

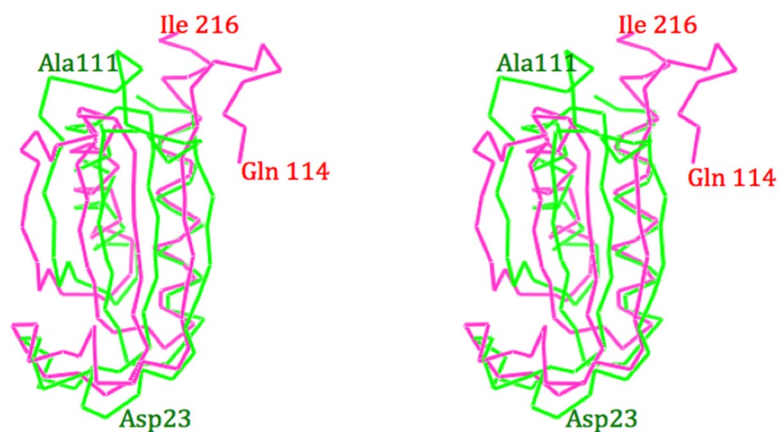

**Fig. S1.** Stereoview of the backbone ( $C\alpha$ - $C\alpha$ ) structures of the N-terminal (green) and C-terminal domains of EutL superimposed on top of each other. The overall rmsd between the structures is 2.7 Å with the largest differences in the loops.

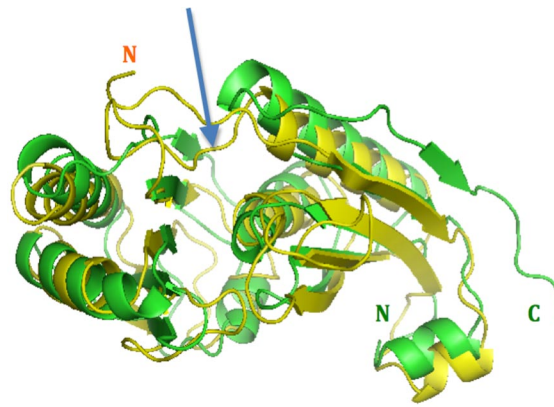

**Fig. S2.** Superposition of EutL (yellow) with 2 structures of Ccmk1 (green). Both of the Ccmk1 structures are taken directly out of the hexamer configuration and show that the relative positioning of the domains of the EutL structure have remained very similar to the positions of the Ccmk1 proteins despite the low sequence identity. The arrow points to the covalent connection between the 2 domains of EutL.

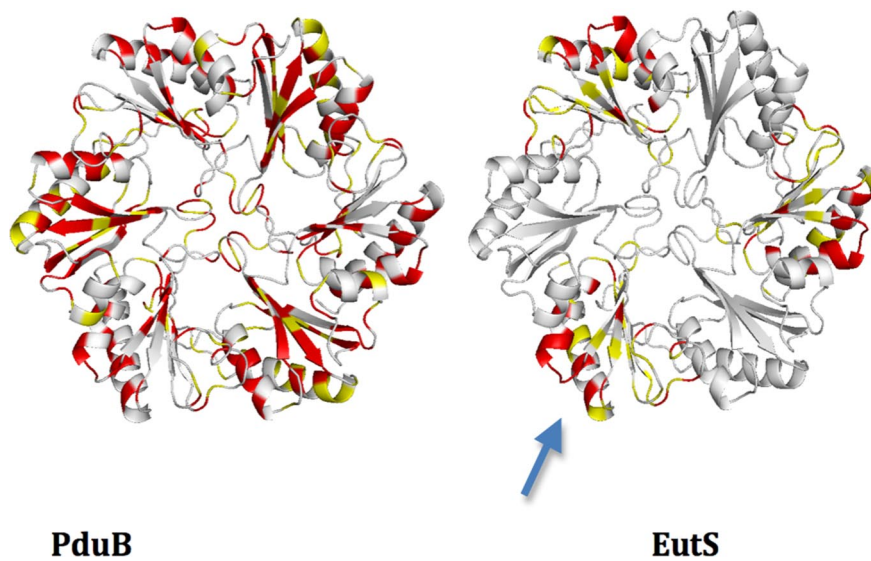

**Fig. S3.** Mapping of the most conservative residues between PduB and EutL (or EutS and EutL) onto the structure of EutL (ribbon diagram). The modeling is based on the alignment by Kofoid et al. (1). Residues that are strictly conserved are highlighted in red, and similar residues are highlighted in yellow. In both cases, most of the conserved residues are located within the domains of the protein. No reliable alignments can be observed around the channel. Conserved residues that may be involved in lateral contacts between the hexagons are also observed in the EutS model (arrow). Shown here is the modeling of the C-terminal domain of EutL only as it aligned best with the sequence of EutS.

1. Kofoid E, Rappleye C, Stojiljkovic I, Roth J (1999) The 17-gene ethanolamine (eut) operon of *Salmonella typhimurium* encodes five homologues of carboxysome shell proteins. *J Bacteriol* 181:5317–5329.

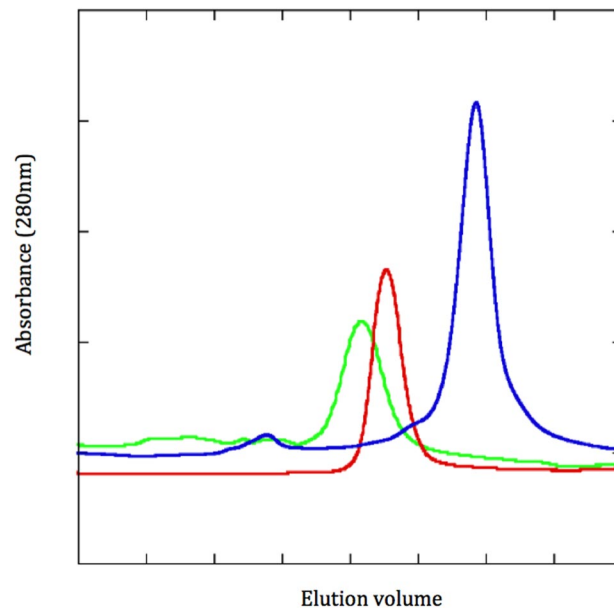

**Fig. S4.** Sephadex 200 size-exclusion chromatography elution profile of EutL. Shown are the individual elution profiles of the protein at different pH and different time intervals after cell lysis. Blue: pH 8.0 (peak: 67.55 kDa, freshly prepared protein); red: pH 6.2 (231 kDa, freshly prepared protein); green: pH 6.2 (323.7 kDa, 120 h after lysis). The protein preferably crystallized at pH 6.5.

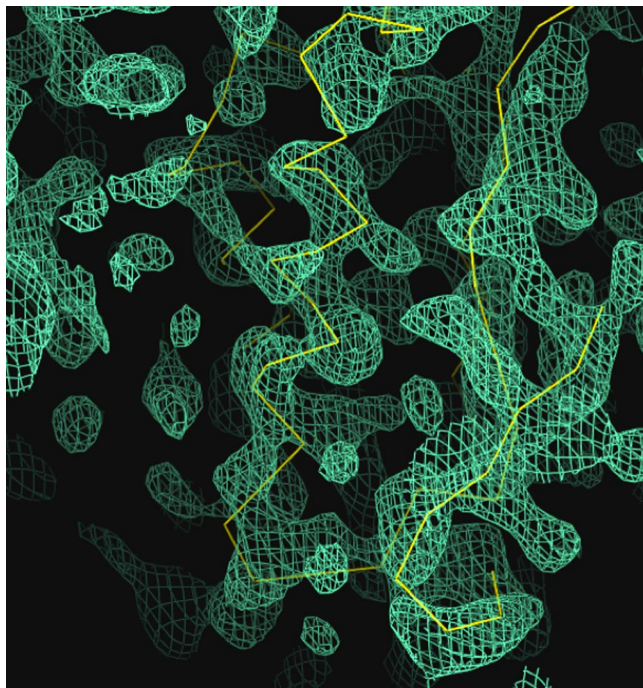

**Fig. S5.** Initial SIR electron density derived from the mercury chloride derivative. The electron density was calculated to 3.6-Å resolution. The backbone from the refined model of Eut-L is superimposed in yellow.

**Table 1. Crystallographic data, phasing, and refinement statistics**

| Data set                                      | NAT                     | D11 HgCl <sub>2</sub> | D4–10 HgCl <sub>2</sub> | D11–2 HgCl <sub>2</sub> | SE-1    |
|-----------------------------------------------|-------------------------|-----------------------|-------------------------|-------------------------|---------|
| X-ray source                                  | SSRL 91                 | SSRL-91               | SSRL 11–2               | SSRL-91                 | SSRL-91 |
| Wavelength                                    | 0.979462                | 0.815659              | 0.97946                 | 0.815659                | 0.97930 |
| Unit cell                                     |                         |                       |                         |                         |         |
| a, Å                                          | 67.57                   | 67.59                 | 67.38                   | 67.59                   | 67.79   |
| b, Å                                          | 67.57                   | 67.59                 | 67.38                   | 67.59                   | 67.79   |
| c, Å                                          | 80.37                   | 79.85                 | 79.66                   | 79.85                   | 80.74   |
| Space group                                   | P3                      | P3                    | P3                      | P3                      | P3      |
| Multiplicity                                  | 3.4                     | 1.9                   | 3.1                     | 2.9                     | 2.8     |
| Resolution, Å                                 | 2.3                     | 3.0                   | 2.2                     | 2.5                     | 3.5     |
| Unique reflections                            | 15,369                  | 7,295                 | 16,696                  | 13,921                  | 12,494  |
| Completeness, %                               | 84.2                    | 89.3                  | 92.7                    | 98.7                    | 86.8    |
| $I/\Sigma(I)$                                 | 9.6                     | 6.4                   | 13.3                    | 3.2                     | 6.5     |
| $R_{\text{sym}}^*$                            | 0.129                   | 0.110                 | 0.078                   | 0.092                   | 0.108   |
| No. heavy atoms                               |                         | 3 (Hg)                | 2 (Hg)                  | 2 (Hg)                  | 3 (Se)  |
| Phasing power <sup>†</sup> (to 3.5 Å)         |                         | 1.2                   | 1.1                     | 1.4                     |         |
| Refinement statistics                         |                         |                       |                         |                         |         |
| Resolution range, Å                           | 26.0–2.2                |                       |                         |                         |         |
| No. reflections (work/test)                   | 34,866/2,944            |                       |                         |                         |         |
| $R_{\text{cryst}}/R_{\text{free}}^{\ddagger}$ | 0.223/0.277             |                       |                         |                         |         |
| No. atoms                                     | 3,489                   |                       |                         |                         |         |
| rmsd from ideal geometry                      |                         |                       |                         |                         |         |
| Bond lengths, Å                               | 0.021                   |                       |                         |                         |         |
| Bond angles, °                                | 2.289                   |                       |                         |                         |         |
| Ramachandran residue statistics               |                         |                       |                         |                         |         |
|                                               | 85.1% core              |                       |                         |                         |         |
|                                               | 13.2% allowed           |                       |                         |                         |         |
|                                               | 1.6% generously allowed |                       |                         |                         |         |
|                                               | 0.0% disallowed         |                       |                         |                         |         |
| Average temperature factor, Å <sup>2</sup>    | 29.5                    |                       |                         |                         |         |
| No. water molecules                           | 189                     |                       |                         |                         |         |
| No. Hg <sup>2+</sup> ions                     | 2                       |                       |                         |                         |         |
| PDB ID code                                   | 3GFH                    |                       |                         |                         |         |

Initial phase calculations were carried out with the datasets NAT, D11, D4–10, and D11–2 and the resulting figure of merit (= 0.58 to 3.5 Å resolution) was calculated with these datasets. Threading of the EutL sequence into the electron density was guided by anomalous dispersion electron density maps calculated with data set SE1. Because of radiation sensitivity, complete multiple wavelength scans of a single crystal failed. The refinement of the model was carried out with dataset D4–10 because of favorable refinement statistics. As this dataset is derived from a mercury-soaked crystal, the final model includes 2 partially-occupied heavy atoms. Additional refinements of the model against native or seleno-methionine data (Se1) confirmed that no structural changes were induced with the binding of the metal.

\* $R_{\text{sym}} = \sum |I - \langle I \rangle| / \sum \langle I \rangle$ , where  $I$  is the observed intensity and  $\langle I \rangle$  is the statistically weighted average intensity of multiple-symmetry related observation.

<sup>†</sup>Phasing power was defined in SOLVE:  $PP = \text{rms}(\text{FH})/\text{rms}(\text{E})$  (1, 2).

<sup>‡</sup> $R$  factors:  $R = \sum ||F_{\text{calc}} - |F_{\text{obs}}|| / \sum |F_{\text{obs}}|$ ; where  $F_{\text{calc}}$  and  $F_{\text{obs}}$  are the calculated and observed structure factors, respectively.  $R_{\text{free}}$  was calculated by using the same formula with 7% of the observed reflections (3).

1. Collaborative Computational Project 4 (1994) The CCP4 suite: Programs for protein crystallography. *Acta Crystallogr D* 50:760–763.
2. Terwilliger TC, Berendzen J (1999) Automated MAD and MIR structure solution. *Acta Crystallographica D* 55:849–861.
3. Brunger AT (1992) Free  $R$  value: A novel statistical quantity for assessing the accuracy of crystal structures. *Nature*. 355:472–475.
